# Supplementary material for: Magnetic colloidosomes fabricated by Fe3O4–SiO2 hetero-nanorods
Source: Royal Society of Chemistry journal article supplement (doi:10.1039/c1sm05184a), 2011-01-01
Supplement: c1sm05184a.pdf [file c1sm05184a.pdf]

Supplementary Material (ESI) for Soft Matter  
This journal is © The Royal Society of Chemistry 2011

## Supplementary Information

# **Magnetic colloidosomes fabricated by $\text{Fe}_3\text{O}_4\text{-SiO}_2$ hetero-nanorods**

Lu Zhang,<sup>a</sup> Fan Zhang,<sup>a</sup> Ying-Shuai Wang,<sup>a</sup> Yun-Lu Sun,<sup>a</sup> Wen-Fei Dong,<sup>\*a</sup> Jun-Feng Song,<sup>a</sup> Qi-Sheng Huo<sup>b</sup> and Hong-Bo Sun<sup>\*a,c</sup>

<sup>a</sup> *State Key Laboratory on Integrated Optoelectronics, College of Electronic Science and Engineering, Jilin University, 2699 Qianjin Street, Changchun 130012, P.R.China.*

*E-mail: [dongwf@jlu.edu.cn](mailto:dongwf@jlu.edu.cn) (W.-F.D.) and [hbsun@jlu.edu.cn](mailto:hbsun@jlu.edu.cn) (H.-B.S.).*

<sup>b</sup> *State Key Laboratory of Inorganic Synthesis and Preparative Chemistry, College of Chemistry, Jilin University, Changchun 130012, P.R.China.*

<sup>c</sup> *College of Physics, Jilin University, 119 Jiefang Road, Changchun 130023, P.R.China. E-mail: [hbsun@jlu.edu.cn](mailto:hbsun@jlu.edu.cn) (H.-B.S.), Tel&Fax: +86 431 85168281.*

Supplementary Material (ESI) for Soft Matter  
This journal is © The Royal Society of Chemistry 2011

**Figure S1.** Contact angle measurement images of  $\text{Fe}_3\text{O}_4$  nanoparticles (a),  $\text{Fe}_3\text{O}_4@\text{SiO}_2$  nanoparticles (b) and  $\text{Fe}_3\text{O}_4$ - $\text{SiO}_2$  rod-like particles (c) surfaces.

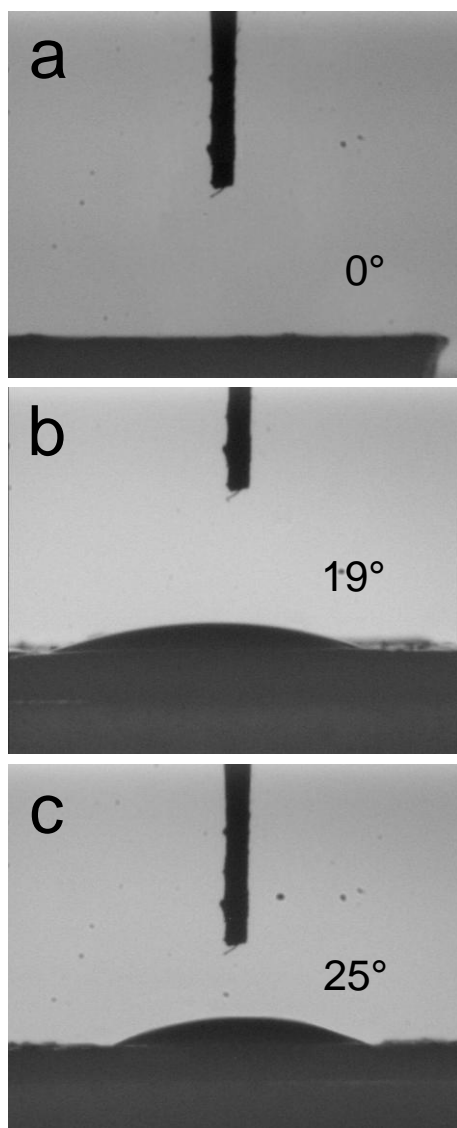

Supplementary Material (ESI) for Soft Matter  
This journal is © The Royal Society of Chemistry 2011

**Figure S2.** TEM images of  $\text{Fe}_3\text{O}_4\text{-SiO}_2$  rod-like particles with different aspect ratio 2:1 (a), 4:1 (b) 5:1 (c) and 7:1 (d).

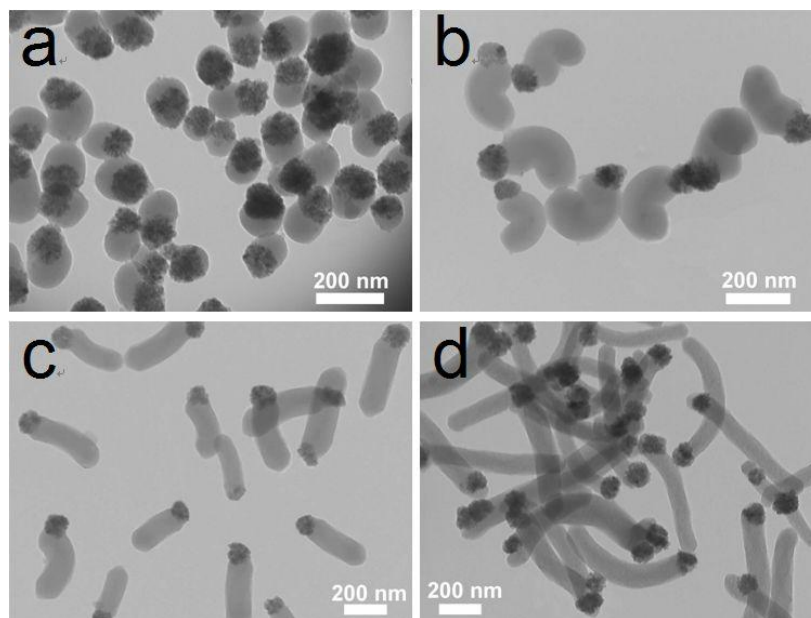

Figure S3. Optical image of water-soluble agarose capsules by gelating the water phase with agarose.

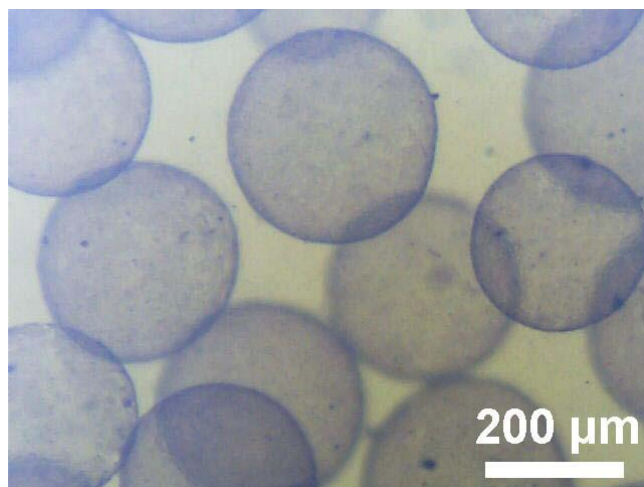

5 mg  $\text{Fe}_3\text{O}_4\text{-SiO}_2$  hetero-nanorods of aspect ratios 3:1 was dissolved in 0.5 mL ethanol for 20 min ultrasound. 1 ml agarose aqueous solution (1.5 wt%) was added into 5 ml preheated toluene at 70 °C, and the agarose aqueous solution would sink to the bottom of the bottle. Then,  $\text{Fe}_3\text{O}_4\text{-SiO}_2$  hetero-nanorods ethanol solution was added into above mixture of toluene and agarose aqueous solution. After emulsification of this three-phase system by vigorous stirring for 10 min at 40 °C, colloidosomes of agarose aqueous solution-in-toluene droplets stabilized with  $\text{Fe}_3\text{O}_4\text{-SiO}_2$  hetero-nanorods were obtained. After cooling to room temperature, the phase of aqueous and ethanol phase turned out gelated. These agarose colloidosomes were washed with ethanol for three times and dispersed in water.
